# Supplementary material for: ACT Transition from Hospital to Home Orthopaedic Survey: a cross-sectional survey of unplanned 30-day readmissions for patients having total hip arthroplasty
Source: HighWire-hosted journal article supplement (doi:10.1136/bmjopen-2021-055576), 2022-05-01
Supplement: bmjopen-2021-055576supp001_data_supplement.pdf [file bmjopen-2021-055576supp001_data_supplement.pdf]

1 **Supplementary table 1** Results of logistic univariate regression analysis examining the  
 2 association between patient, hospital and general practice factors associated with unplanned  
 3 30-day readmission to hospital (all variables)

4

| Variables                                         | Crude<br>OR | 95% CI          | <i>p value</i> | aOR    | 95% CI          | <i>p value</i> |
|---------------------------------------------------|-------------|-----------------|----------------|--------|-----------------|----------------|
| <b>Comorbidities</b>                              |             |                 |                |        |                 |                |
| Arthritis                                         | 0.754       | [0.291, 1.953]  | 0.561          | 0.755  | [0.291, 1.962]  | 0.564          |
| Osteoporosis                                      | 2.108       | [0.787, 5.645]  | 0.138          | 2.04   | [0.744, 5.592]  | 0.166          |
| Asthma                                            | 0.762       | [0.218, 2.669]  | 0.671          | 0.792  | [0.225, 2.783]  | 0.716          |
| COPD, ARDS,<br>emphysema                          | 1.188       | [0.148, 9.544]  | 0.871          | 1.112  | [0.138, 8.947]  | 0.921          |
| Angina                                            | 1.000       | -               | -              | 1      | -               | -              |
| Congestive heart<br>failure (or heart<br>disease) | 6.540       | [1.884, 22.698] | 0.003          | 6.0339 | [1.708, 21.312] | 0.005          |
| Heart attack                                      | 1.000       | -               | -              | 1      | -               | -              |
| Neurological<br>disease                           | 1.367       | [0.168, 11.127] | 0.770          | 1.413  | [0.171, 11.683] | 0.748          |
| Stroke/ TIA                                       | 1.536       | [0.336, 7.020]  | 0.580          | 1.428  | [0.301, 6.764]  | 0.654          |
| Peripheral<br>vascular disease                    | 9.542       | [2.134, 42.671] | 0.003          | 8.772  | [1.901, 40.481] | 0.005          |
| Diabetes                                          | 1.638       | [0.531, 5.052]  | 0.391          | 1.595  | [0.516, 4.931]  | 0.418          |
| Upper GI disease                                  | 1.451       | [0.620, 3.395]  | 0.391          | 1.482  | [0.628, 3.499]  | 0.369          |
| Depression                                        | 1.259       | [0.484, 3.271]  | 0.637          | 1.326  | [0.504, 3.491]  | 0.567          |

|                                       |       |                |       |       |                |       |
|---------------------------------------|-------|----------------|-------|-------|----------------|-------|
| Anxiety or panic disorders            | 1.855 | [0.658, 5.230] | 0.243 | 2.187 | [0.746, 6.406] | 0.154 |
| Visual impairment                     | 2.348 | [1.004, 5.490] | 0.049 | 2.503 | [0.984, 6.364] | 0.054 |
| Hearing impairment                    | 1.276 | [0.458, 3.553] | 0.641 | 1.126 | [0.381, 3.324] | 0.83  |
| Degenerative disc disease             | 0.824 | [0.274, 2.485] | 0.732 | 0.791 | [0.261, 2.397] | 0.679 |
| <b>Comorbidity scale</b>              | 1.163 | [0.858, 1.576] | 0.332 | 1.148 | [0.841, 1.566] | 0.384 |
| <b>Self-rated health</b>              | 0.603 | [0.371, 0.977] | 0.040 | 0.608 | [0.376, 0.984] | 0.043 |
| <hr/>                                 |       |                |       |       |                |       |
| <b>Before you went to hospital</b>    |       |                |       |       |                |       |
| Invited to attend session by surgeon  | 0.875 | [0.358, 2.142] | 0.770 | 0.921 | [0.370, 2.293] | 0.859 |
| Attended information session          | 0.690 | [0.310, 1.538] | 0.365 | 0.647 | [0.288, 1.453] | 0.292 |
| Usefulness of the information session | 0.620 | [0.248, 1.550] | 0.307 | 0.618 | [0.248, 1.543] | 0.303 |

|                |       |                |       |       |                |       |
|----------------|-------|----------------|-------|-------|----------------|-------|
| Given          |       |                |       |       |                |       |
| information    | 0.926 | [0.116, 7.401] | 0.942 | 1.048 | [0.129, 8.528] | 0.965 |
| package or     |       |                |       |       |                |       |
| checklist      |       |                |       |       |                |       |
| Use of         |       |                |       |       |                |       |
| information or | 1.000 | -              | -     | 1     | -              | -     |
| checklist      |       |                |       |       |                |       |

---

### In the hospital

#### Pain

##### Experienced pain

|                 |       |                |       |       |                |       |
|-----------------|-------|----------------|-------|-------|----------------|-------|
| during hospital | 1.131 | [0.414, 3.091] | 0.810 | 1.136 | [0.415, 3.111] | 0.804 |
| stay            |       |                |       |       |                |       |

|            |       |                |       |      |                |       |
|------------|-------|----------------|-------|------|----------------|-------|
| Worst Pain | 1.383 | [0.616, 3.106] | 0.432 | 1.39 | [0.618, 3.127] | 0.426 |
|------------|-------|----------------|-------|------|----------------|-------|

|                  |       |                |       |       |                |       |
|------------------|-------|----------------|-------|-------|----------------|-------|
| General level of |       |                |       |       |                |       |
| pain in hospital | 1.098 | [0.488, 2.473] | 0.821 | 1.109 | [0.492, 2.503] | 0.803 |

|                   |       |                |       |       |                |       |
|-------------------|-------|----------------|-------|-------|----------------|-------|
| Pain on discharge | 0.513 | [0.150, 1.752] | 0.287 | 0.522 | [0.152, 1.788] | 0.301 |
|-------------------|-------|----------------|-------|-------|----------------|-------|

##### Medication for

|              |       |                |       |       |                |       |
|--------------|-------|----------------|-------|-------|----------------|-------|
| pain control | 0.293 | [0.059, 1.455] | 0.133 | 0.271 | [0.053, 1.377] | 0.115 |
| helped       |       |                |       |       |                |       |

|               |       |                |       |       |                |       |
|---------------|-------|----------------|-------|-------|----------------|-------|
| Ice to manage |       |                |       |       |                |       |
| pain          | 0.844 | [0.357, 1.995] | 0.700 | 0.918 | [0.379, 2.224] | 0.849 |

|           |       |                |       |       |                |       |
|-----------|-------|----------------|-------|-------|----------------|-------|
| Breathing |       |                |       |       |                |       |
| exercise  | 0.635 | [0.286, 1.406] | 0.263 | 0.634 | [0.286, 1.408] | 0.263 |

#### Rest/ sleep

|                                                             |       |                |       |       |                |       |
|-------------------------------------------------------------|-------|----------------|-------|-------|----------------|-------|
| Single/ shared room                                         | 1.099 | [0.449, 2.690] | 0.836 | 1.028 | [0.417, 2.532] | 0.952 |
| Quality of sleep                                            | 2.400 | [1.082, 5.323] | 0.031 | 2.431 | [1.094, 5.405] | 0.029 |
| Medication for sleep                                        | 0.794 | [0.312, 2.032] | 0.633 | 0.794 | [0.310, 2.033] | 0.631 |
| Feel rested when leaving hospital                           | 3.105 | [1.353, 7.127] | 0.008 | 3.354 | [1.454, 7.733] | 0.005 |
| Total sleep score                                           | 1.484 | [1.016, 2.165] | 0.041 | 1.487 | [1.020, 2.167] | 0.039 |
| <b>Diet</b>                                                 |       |                |       |       |                |       |
| Dietary requirement met                                     | 1.246 | [0.411, 3.775] | 0.698 | 1.221 | [0.400, 3.728] | 0.725 |
| Water in reach                                              | 0.915 | [0.116, 7.233] | 0.933 | 1.026 | [0.128, 8.215] | 0.981 |
| Quality of food in hospital                                 | 0.618 | [0.141, 2.708] | 0.523 | 0.605 | [0.137, 2.664] | 0.506 |
| Total diet score                                            | 0.964 | [0.525, 1.771] | 0.906 | 0.966 | [0.527, 1.772] | 0.911 |
| <b>Public vs Private Hospital</b>                           |       |                |       |       |                |       |
|                                                             | 1.651 | [0.730, 3.734] | 0.229 | 1.653 | [0.729, 3.748] | 0.229 |
| <b>Post-hospital syndrome</b>                               |       |                |       |       |                |       |
|                                                             | 0.962 | [0.751, 1.232] | 0.760 | 0.973 | [0.759, 1.246] | 0.826 |
| <b>Discussions of medications with health care provider</b> |       |                |       |       |                |       |
|                                                             | 0.952 | [0.347, 2.612] | 0.924 | 0.989 | [0.351, 2.788] | 0.983 |

**Patient****medication****enablement**

|                                                       |       |                |       |       |                |       |
|-------------------------------------------------------|-------|----------------|-------|-------|----------------|-------|
| Better understand<br>use of medication                | 0.569 | [0.156, 2.072] | 0.393 | 0.562 | [0.154, 2.052] | 0.383 |
| Feel more<br>confident about<br>taking<br>medications | 0.422 | [0.132, 1.351] | 0.146 | 0.416 | [0.129, 1.342] | 0.142 |
| Take your<br>medications                              | 0.374 | [0.128, 1.097] | 0.073 | 0.372 | [0.127, 1.092] | 0.072 |
| Total medication<br>enablement                        | 0.794 | [0.509, 1.236] | 0.306 | 0.789 | [0.504, 1.233] | 0.298 |

**Patient****enablement**

|                                         |       |                |       |       |                |       |
|-----------------------------------------|-------|----------------|-------|-------|----------------|-------|
| Able to cope with<br>life               | 0.737 | [0.454, 1.199] | 0.219 | 0.748 | [0.460, 1.218] | 0.243 |
| Able to<br>understand your<br>condition | 0.806 | [0.491, 1.322] | 0.393 | 0.812 | [0.493, 1.338] | 0.415 |
| Able to cope with<br>your condition     | 0.837 | [0.498, 1.406] | 0.501 | 0.84  | [0.499, 1.413] | 0.51  |
| Able to keep<br>yourself healthy        | 0.957 | [0.577, 1.587] | 0.865 | 0.962 | [0.578, 1.602] | 0.882 |

|                                                              |        |                      |       |        |                      |       |
|--------------------------------------------------------------|--------|----------------------|-------|--------|----------------------|-------|
| Confident about<br>your health                               | 0.797  | [0.487, 1.303]       | 0.365 | 0.808  | [0.493, 1.323]       | 0.397 |
| Able to help<br>yourself                                     | 0.685  | [0.420, 1.117]       | 0.129 | 0.691  | [0.422, 1.130]       | 0.141 |
| <b>Total<br/>enablement</b>                                  | 0.741  | [0.337, 1.630]       | 0.456 | 0.742  | [0.335, 1.641]       | 0.461 |
| <hr/>                                                        |        |                      |       |        |                      |       |
| <b>When you got<br/>home from<br/>hospital</b>               |        |                      |       |        |                      |       |
| Recall being<br>given information<br>about who to<br>contact | 0.920  | [0.303, 2.792]       | 0.883 | 0.986  | [0.321, 3.030]       | 0.98  |
| Who you were<br>instructed to<br>contact                     | 0.938  | [0.852, 1.033]       | 0.193 | 0.936  | [0.849, 1.031]       | 0.18  |
| Go to ED within<br>30 days of<br>discharge                   | 50.171 | [19.089,<br>131.868] | 0.000 | 47.948 | [18.230,<br>126.113] | 0     |
| <hr/>                                                        |        |                      |       |        |                      |       |
| <b>General Practice<br/>Questions</b>                        |        |                      |       |        |                      |       |
| Regular GP<br>practice                                       | 0.253  | [0.050, 1.281]       | 0.097 | 0.246  | [0.048, 1.265]       | 0.093 |

|                                             |       |                 |       |       |                 |       |
|---------------------------------------------|-------|-----------------|-------|-------|-----------------|-------|
| Sees the same<br>doctor                     | 1.000 |                 |       | 1     | -               | -     |
| Regular<br>appointments<br>with GP          | 1.067 | [0.485, 2.344]  | 0.872 | 0.947 | [0.419, 2.139]  | 0.896 |
| Discussion of<br>plan with GP               | 1.436 | [0.582, 3.539]  | 0.432 | 1.38  | [0.558, 3.412]  | 0.486 |
| When were you<br>advised to see GP<br>next  | 0.626 | [0.252, 1.553]  | 0.312 | 0.651 | [0.262, 1.619]  | 0.356 |
| Usual waiting<br>time to see GP             | 0.995 | [0.644, 1.539]  | 0.983 | 0.991 | [0.642, 1.531]  | 0.969 |
| How soon after<br>surgery did you<br>see GP | 0.738 | [0.560, 1.508]  | 0.738 | 0.912 | [0.557, 1.493]  | 0.715 |
| Did GP know<br>you were in<br>hospital      | 1.550 | [0.198, 12.102] | 0.676 | 1.465 | [0.185, 11.608] | 0.718 |
| Attendance to<br>rehab program              | 1.458 | [0.569, 3.736]  | 0.432 | 1.53  | [0.596, 3.927]  | 0.377 |
| Attendance to<br>rehab within 5<br>days     | 1.241 | [0.729, 2.110]  | 0.426 | 0.874 | [0.446, 1.71]   | 0.693 |

|                               |       |                 |       |       |                 |       |
|-------------------------------|-------|-----------------|-------|-------|-----------------|-------|
| Length of attendance to rehab | 0.894 | [0.457, 1.749]  | 0.744 | 0.716 | [0.529, 0.971]  | 0.031 |
| <b>BMI</b>                    | 1.527 | [0.893, 2.611]  | 0.122 | 1.052 | [1.002, 1.104]  | 0.042 |
| <b>Height</b>                 | 0.503 | [0.018, 13.852] | 0.685 | 0.476 | [0.014, 16.283] | 0.681 |
| <b>Weight</b>                 | 1.019 | [0.999, 1.039]  | 0.059 | 1.022 | [1.001, 1.043]  | 0.037 |
| <b>Living situation</b>       | 0.805 | [0.611, 1.062]  | 0.125 | 0.803 | [0.602, 1.070]  | 0.134 |
| <b>Living alone</b>           | 0.567 | [0.245, 1.312]  | 0.185 | 0.561 | [0.234, 1.346]  | 0.196 |

5

6 **Supplementary table 2** Patients with the listed variable that were readmitted compared to

7 those that were not readmitted

8

|                                    | Yes but not readmitted |        | Readmitted |       |
|------------------------------------|------------------------|--------|------------|-------|
|                                    | n=355                  | %      | n=27       | %     |
| <b>Variables</b>                   |                        |        |            |       |
| Comorbidities                      |                        |        |            |       |
| Arthritis                          | 283                    | 93.40  | 20         | 6.60  |
| Osteoporosis                       | 50                     | 89.29  | 6          | 10.71 |
| Asthma                             | 61                     | 95.31  | 3          | 4.69  |
| COPD, ARDS, emphysema              | 12                     | 92.31  | 1          | 7.69  |
| Angina                             | 9                      | 100.00 | 0          | 0.00  |
| Congestive heart failure (or heart |                        |        |            |       |
| disease)                           | 10                     | 71.43  | 4          | 28.57 |
| Heart attack                       | 9                      | 100.00 | 0          | 0.00  |
| Neurological disease               | 10                     | 90.91  | 1          | 9.09  |
| Stroke/ TIA                        | 19                     | 90.48  | 2          | 9.52  |
| Peripheral vascular disease        | 5                      | 62.50  | 3          | 37.50 |
| Diabetes                           | 37                     | 90.24  | 4          | 9.76  |
| Upper GI disease                   | 95                     | 91.35  | 9          | 8.65  |
| Depression                         | 69                     | 92.00  | 6          | 8.00  |
| Anxiety or panic disorders         | 42                     | 89.36  | 5          | 10.64 |
| Visual impairment                  | 80                     | 88.89  | 10         | 11.11 |
| Hearing impairment                 | 59                     | 92.19  | 5          | 7.81  |
| Degenerative disc disease          | 64                     | 94.12  | 4          | 5.88  |

**Comorbidity scale**

|    |     |        |    |       |
|----|-----|--------|----|-------|
| 0  | 40  | 93.02  | 3  | 6.98  |
| 1  | 188 | 95.43  | 9  | 4.57  |
| 2  | 88  | 88.89  | 11 | 11.11 |
| 3  | 25  | 89.29  | 3  | 10.71 |
| 4  | 11  | 91.67  | 1  | 8.33  |
| 5  | 1   | 100.00 | 0  | 0.00  |
| 6  | 1   | 100.00 | 0  | 0.00  |
| 11 | 1   | 100.00 | 0  | 0.00  |

**Self rated health**

|           |     |       |    |       |
|-----------|-----|-------|----|-------|
| Poor      | 3   | 0.85  | 0  | 0.00  |
| Fair      | 48  | 13.56 | 7  | 25.93 |
| Good      | 152 | 42.94 | 13 | 48.15 |
| Very Good | 128 | 36.16 | 7  | 25.93 |
| Excellent | 23  | 6.50  | 0  | 0.00  |

**Before you went to hospital**

|                                      |     |       |    |      |
|--------------------------------------|-----|-------|----|------|
| Invited to attend session by surgeon | 271 | 93.13 | 20 | 6.87 |
| Attended information session         | 184 | 93.40 | 13 | 6.60 |

**Usefulness of session for surgery****prep**

|                   |    |        |   |       |
|-------------------|----|--------|---|-------|
| Not very useful   | 6  | 100.00 | 0 | 0.00  |
| Moderately useful | 42 | 87.50  | 6 | 12.50 |

|                                           |     |       |    |       |
|-------------------------------------------|-----|-------|----|-------|
| Very useful                               | 144 | 94.74 | 8  | 5.26  |
| Given information package or<br>checklist | 337 | 92.84 | 26 | 7.16  |
| Use of information or checklist           | 334 | 92.78 | 26 | 7.22  |
| <b>Pain</b>                               |     |       |    |       |
| Worst Pain (less than 6)                  | 157 | 94.01 | 10 | 5.99  |
| Worst Pain (6 or more)                    | 193 | 91.90 | 17 | 8.10  |
| General pain (less than 6)                | 224 | 92.95 | 17 | 7.05  |
| General pain (6 or more)                  | 120 | 92.31 | 10 | 7.69  |
| Pain on discharge (less than 6)           | 283 | 92.18 | 24 | 7.82  |
| Pain on discharge (6 or more)             | 69  | 95.83 | 3  | 4.17  |
| Total pain score                          |     |       |    |       |
| Medication for pain control helped        | 341 | 93.17 | 25 | 6.83  |
| Ice to manage pain                        | 256 | 93.09 | 19 | 6.91  |
| Breathing exercise                        | 182 | 94.30 | 11 | 5.70  |
| Single room                               | 267 | 93.03 | 20 | 6.97  |
| Shared room                               | 85  | 92.39 | 7  | 7.61  |
| Quality of sleep (average or good)        | 264 | 94.62 | 15 | 5.38  |
| Quality of sleep (poor)                   | 88  | 88.00 | 12 | 12.00 |
| Medication for sleep                      | 93  | 93.94 | 6  | 6.06  |
| Feel rested when leaving hospital         | 236 | 95.93 | 10 | 4.07  |
| Total sleep score                         |     |       |    |       |

|                                               |     |       |    |      |
|-----------------------------------------------|-----|-------|----|------|
| Dietary requirement met                       | 308 | 93.05 | 23 | 6.95 |
| Water in reach                                | 333 | 92.76 | 26 | 7.24 |
| Quality of food in hospital (average or good) | 309 | 92.51 | 25 | 7.49 |
| Quality of food in hospital (poor)            | 40  | 95.24 | 2  | 4.76 |
| Total diet score                              |     |       |    |      |

### Post-hospital syndrome

|   |    |        |    |       |
|---|----|--------|----|-------|
| 0 | 2  | 100.00 | 0  | 0.00  |
| 1 | 25 | 89.29  | 3  | 10.71 |
| 2 | 30 | 93.75  | 2  | 6.25  |
| 3 | 64 | 91.43  | 6  | 8.57  |
| 4 | 95 | 95.96  | 4  | 4.04  |
| 5 | 64 | 90.14  | 64 | 9.86  |
| 6 | 61 | 93.85  | 61 | 6.15  |
| 7 | 14 | 93.33  | 14 | 6.67  |

### Discussions of medications with

|                             |     |        |    |       |
|-----------------------------|-----|--------|----|-------|
| <b>health care provider</b> | 282 | 92.76  | 22 | 7.24  |
| Doctor                      | 43  | 93.48  | 3  | 6.52  |
| Nurse                       | 108 | 93.10  | 8  | 6.90  |
| Pharmacist                  | 9   | 90.00  | 1  | 10.00 |
| Physiotherapist             | 1   | 100.00 | 0  | 0.00  |
| More than one               | 114 | 92.68  | 9  | 7.32  |

### Patient medication enablement

|                                     |     |       |    |       |
|-------------------------------------|-----|-------|----|-------|
| Better understand use of medication | 253 | 91.34 | 18 | 85.71 |
| Feel more confident about taking    |     |       |    |       |
| medications                         | 252 | 90.97 | 17 | 80.95 |
| Take your medications               | 248 | 89.53 | 16 | 76.19 |
| Total medication enablement         |     |       |    |       |

### Patient enablement

|              |     |       |    |      |
|--------------|-----|-------|----|------|
| Less enabled | 163 | 91.57 | 15 | 8.43 |
| More enabled | 176 | 93.62 | 12 | 6.38 |

### When you get home from hospital

|                                |     |       |    |      |
|--------------------------------|-----|-------|----|------|
| Recall being given information |     |       |    |      |
| about who to contact           | 291 | 93.27 | 21 | 6.73 |

### Who were you instructed to

|                                  |     |       |    |       |
|----------------------------------|-----|-------|----|-------|
| contact                          | 291 | 93.27 | 21 | 6.73  |
| ED                               | 52  | 17.93 | 5  | 21.74 |
| ED, other                        | 2   | 0.69  | 0  | 0.00  |
| GP                               | 93  | 32.07 | 9  | 39.13 |
| GP, ED                           | 22  | 7.59  | 4  | 17.39 |
| GP, other                        | 1   | 0.34  | 0  | 0.00  |
| Nurse at hospital                | 26  | 8.97  | 0  | 0.00  |
| Nurse at hospital, ED            | 3   | 1.03  | 0  | 0.00  |
| Nurse at hospital, GP            | 2   | 0.69  | 0  | 0.00  |
| Nurse at hospital, GP, ED        | 3   | 1.03  | 0  | 0.00  |
| Nurse at hospital, GP, ED, Other | 1   | 0.34  | 0  | 0.00  |

|                                     |     |       |    |       |
|-------------------------------------|-----|-------|----|-------|
| Other                               | 6   | 2.07  | 0  | 0.00  |
| Surgeon                             | 40  | 13.79 | 3  | 13.04 |
| Surgeon, ED                         | 3   | 1.03  | 1  | 4.35  |
| Surgeon, GP                         | 8   | 2.76  | 1  | 4.35  |
| Surgeon, GP, ED                     | 9   | 3.10  | 0  | 0.00  |
| Surgeon, GP, Other                  | 1   | 0.34  | 0  | 0.00  |
| Surgeon, Nurse at hospital          | 8   | 2.76  | 0  | 0.00  |
| Surgeon, Nurse at hospital, ED      | 3   | 1.03  | 0  | 0.00  |
| Surgeon, Nurse at hospital, GP      | 6   | 2.07  | 0  | 0.00  |
| Surgeon, Nurse at hospital, GP, ED  | 1   | 0.34  | 0  | 0.00  |
| <b>Went to ED within 30 days of</b> |     |       |    |       |
| <b>discharge</b>                    | 16  | 45.71 | 19 | 54.29 |
| <b>Reasons for going to the ED</b>  |     |       |    |       |
| Wound problems                      | 2   | 5.41  | 2  | 50.00 |
| Pain                                | 5   | 13.51 | 5  | 50.00 |
| Other                               | 11  | 29.73 | 12 | 52.17 |
| <b>General Practice Questions</b>   |     |       |    |       |
| Regular GP practice                 | 346 | 93.26 | 25 | 6.74  |
| Sees the same doctor                | 338 | 92.60 | 27 | 7.40  |
| Regular appointments with GP        | 191 | 92.72 | 15 | 7.28  |
| Discussio of plan with GP           | 206 | 91.96 | 18 | 8.04  |

**When were you advised to see GP****next**

|            |     |       |    |       |
|------------|-----|-------|----|-------|
| 1-6 weeks  | 269 | 93.40 | 19 | 6.60  |
| Don't know | 62  | 89.96 | 7  | 10.14 |

**Usual waiting time to see GP**

|                         |     |        |    |       |
|-------------------------|-----|--------|----|-------|
| Same day                | 40  | 90.91  | 4  | 9.09  |
| Within a couple of days | 189 | 93.56  | 13 | 6.44  |
| Within one week         | 75  | 94.94  | 4  | 5.06  |
| 1-2 weeks               | 37  | 88.10  | 5  | 11.90 |
| >2 weeks                | 9   | 100.00 | 0  | 0.00  |

**How soon after surgery did you****see GP?**

|               |     |       |    |       |
|---------------|-----|-------|----|-------|
| Within 1 week | 134 | 91.78 | 12 | 8.22  |
| 2-3 weeks     | 130 | 94.89 | 7  | 5.11  |
| 4-6 weeks     | 34  | 89.47 | 4  | 10.53 |
| Don't know    | 20  | 95.24 | 1  | 4.76  |

**Did the GP know you were in**

|                 |     |       |    |      |
|-----------------|-----|-------|----|------|
| <b>hospital</b> | 282 | 92.46 | 23 | 7.54 |
|-----------------|-----|-------|----|------|

**Attendance to rehab program**

|                |     |       |    |       |
|----------------|-----|-------|----|-------|
| within 5 days  | 125 | 91.91 | 11 | 8.09  |
| within 2 weeks | 116 | 93.55 | 8  | 6.45  |
| within 4 weeks | 16  | 88.89 | 2  | 11.11 |

|                                     |     |        |    |       |
|-------------------------------------|-----|--------|----|-------|
| don't know                          | 5   | 100.00 | 0  | 0.00  |
| <b>Lenth of attendance to rehab</b> |     |        |    |       |
| One week                            | 20  | 80.00  | 5  | 20.00 |
| 2 weeks                             | 20  | 95.24  | 1  | 4.76  |
| 3 weeks                             | 17  | 89.47  | 2  | 10.53 |
| 4 weeks                             | 50  | 90.91  | 5  | 9.09  |
| >4 weeks                            | 128 | 95.52  | 6  | 4.48  |
| <b>BMI</b>                          |     |        |    |       |
| <21                                 | 19  | 95.00  | 1  | 5.00  |
| 21-25                               | 85  | 96.59  | 3  | 3.41  |
| 26-40                               | 205 | 90.71  | 21 | 9.29  |
| 41-60                               | 12  | 85.71  | 2  | 14.29 |
| <b>Public vs Private Hospital</b>   |     |        |    |       |
| Public                              | 93  | 90.29  | 10 | 9.71  |
| Private                             | 261 | 93.88  | 17 | 6.12  |
| <b>Living situation</b>             |     |        |    |       |
| Alone                               | 78  | 89.66  | 9  | 10.34 |
| Not alone                           | 275 | 93.86  | 18 | 6.14  |

9

10

11
