# Supplementary material for: ACT Transition from Hospital to Home Orthopaedic Survey: a cross-sectional survey of unplanned 30-day readmissions for patients having total hip arthroplasty
Source: HighWire-hosted journal article supplement (doi:10.1136/bmjopen-2021-055576), 2022-05-01
Supplement: bmjopen-2021-055576supp002_data_supplement.pdf [file bmjopen-2021-055576supp002_data_supplement.pdf]

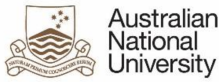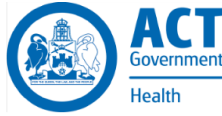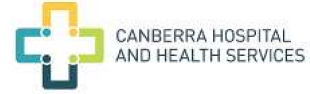ID no. 

## ACT Transition from Hospital to Home Survey

Thank you for answering this voluntary survey, which will not identify you personally in any way. Your answers will provide important information about your recent experience in hospital and your transfer from hospital back to home and to care provided in the community and general practice. We will use this information to improve the services we provide. Please do not feel any pressure to complete this survey, however your input is very valuable and we would appreciate hearing your point of view. If you choose not to participate in this study, it will have no effect on the care you receive either now or in the future.

This survey will take about **10 minutes** to complete.

### How to fill in this survey

Most of the questions can be answered by placing a tick in the box next to the answer that best applies to you, the patient. **Please tick only one answer** for each question unless otherwise directed.

Please place your completed survey in the box provided in the waiting room.

**If you would like to know more about this study**, please contact the chief investigator:

Jane Desborough,  
Department of Health Services Research and Policy  
Research School of Population Health, Australian National University  
on 6125 6545 or [jane.desborough@anu.edu.au](mailto:jane.desborough@anu.edu.au)

### Who should I contact if I have concerns about the conduct of this study?

This study has been approved by the ACT Health, Calvary Hospital and the Australian National University Human Research Ethics Committees. If you have any concerns or complaints about the conduct of the study, and do not feel comfortable discussing this with study staff, you may contact the Committee secretariat who is nominated to receive complaints about research projects:

Calvary Hospital Ethics Committee on 6264 7162 or [ethics@calvary-act.com.au](mailto:ethics@calvary-act.com.au)

The Australian National University on 6125 3427 or [Human.Ethics.Officer@anu.edu.au](mailto:Human.Ethics.Officer@anu.edu.au)

**A. About your health (Please tick one box for each question)****1. Has a doctor EVER told you that you have one of these conditions?**

- |                                                                                                              |                                |                               |                                   |
|--------------------------------------------------------------------------------------------------------------|--------------------------------|-------------------------------|-----------------------------------|
| 1. Arthritis                                                                                                 | 1 <input type="checkbox"/> Yes | 2 <input type="checkbox"/> No | 3 <input type="checkbox"/> Unsure |
| 2. Osteoporosis                                                                                              | 1 <input type="checkbox"/> Yes | 2 <input type="checkbox"/> No | 3 <input type="checkbox"/> Unsure |
| 3. Asthma                                                                                                    | 1 <input type="checkbox"/> Yes | 2 <input type="checkbox"/> No | 3 <input type="checkbox"/> Unsure |
| 4. Chronic obstructive pulmonary disease (COPD), acquired respiratory distress syndrome (ARDS, or emphysema) | 1 <input type="checkbox"/> Yes | 2 <input type="checkbox"/> No | 3 <input type="checkbox"/> Unsure |
| 5. Angina                                                                                                    | 1 <input type="checkbox"/> Yes | 2 <input type="checkbox"/> No | 3 <input type="checkbox"/> Unsure |
| 6. Congestive heart failure (or heart disease)                                                               | 1 <input type="checkbox"/> Yes | 2 <input type="checkbox"/> No | 3 <input type="checkbox"/> Unsure |
| 7. Heart attack                                                                                              | 1 <input type="checkbox"/> Yes | 2 <input type="checkbox"/> No | 3 <input type="checkbox"/> Unsure |
| 8. Neurological disease (e.g. Multiple Sclerosis or Parkinson's)                                             | 1 <input type="checkbox"/> Yes | 2 <input type="checkbox"/> No | 3 <input type="checkbox"/> Unsure |
| 9. Stroke or transient ischaemic attack (TIA)                                                                | 1 <input type="checkbox"/> Yes | 2 <input type="checkbox"/> No | 3 <input type="checkbox"/> Unsure |
| 10. Peripheral vascular disease                                                                              | 1 <input type="checkbox"/> Yes | 2 <input type="checkbox"/> No | 3 <input type="checkbox"/> Unsure |
| 11. Diabetes types I and II                                                                                  | 1 <input type="checkbox"/> Yes | 2 <input type="checkbox"/> No | 3 <input type="checkbox"/> Unsure |
| 12. Upper gastrointestinal disease (ulcer, hernia, reflux)                                                   | 1 <input type="checkbox"/> Yes | 2 <input type="checkbox"/> No | 3 <input type="checkbox"/> Unsure |
| 13 Depression                                                                                                | 1 <input type="checkbox"/> Yes | 2 <input type="checkbox"/> No | 3 <input type="checkbox"/> Unsure |
| 14 Anxiety or panic disorders                                                                                | 1 <input type="checkbox"/> Yes | 2 <input type="checkbox"/> No | 3 <input type="checkbox"/> Unsure |
| 15. Visual impairment<br>(e.g. cataracts, glaucoma, macular degeneration)                                    | 1 <input type="checkbox"/> Yes | 2 <input type="checkbox"/> No | 3 <input type="checkbox"/> Unsure |
| 16. Hearing impairment<br>(very hard of hearing, even with hearing aids)                                     | 1 <input type="checkbox"/> Yes | 2 <input type="checkbox"/> No | 3 <input type="checkbox"/> Unsure |
| 17. Degenerative disc disease (back disease, spinal stenosis or severe chronic back pain)                    | 1 <input type="checkbox"/> Yes | 2 <input type="checkbox"/> No | 3 <input type="checkbox"/> Unsure |

**2. Which health condition or conditions impact most on your daily life?**  
\_\_\_\_\_**3. In general, how would you rate your health?**1  Poor 2  Fair 3  Good 4  Very good 5  Excellent**B. Before you went to hospital for your hip or knee surgery recently****1. Do you recall being invited to attend an information session by your surgeon?**1  Yes 2  No 3  Don't know**➤ If Yes, did you attend the information session?**1  Yes 2  No 3  Don't know**➤ If yes, how useful was this in preparing you for surgery?**1  Not very useful 2  Moderately useful 3  Very useful**2. Do you recall being given an information package or checklist to help you prepare for surgery?**1  Yes 2  No 3  Don't know**➤ If yes, did you use this?**1  Yes 2  No 3  Don't know**C. When you were in hospital for your surgery recently****1. Which surgery did you have?**1  Hip surgery 2  Knee surgery**2. Did you experience pain during your stay in hospital?**1  Yes 2  No 3  Don't know**3. How would you describe the worst level of pain you experienced?**

Please circle your response (0 = no pain and 10 = worst pain ever)

0 1 2 3 4 5 6 7 8 9 10

**4. How would you describe the general level of pain you experienced?**

Please circle your response (0 = no pain and 10 = worst pain ever)

0 1 2 3 4 5 6 7 8 9 10

**5. Overall, did the medication you received in hospital help to control your pain?**

1  Yes 2  No 3  Don't know

**6. Were you shown how to use ice to help manage your pain?**

1  Yes 2  No 3  Don't know

**7. Were you shown breathing exercises to help you manage your pain?**

1  Yes 2  No 3  Don't know

**8. When you left hospital, how would you rate your pain out of 10?**

Please circle your response (0 = no pain and 10 = worst pain ever)

0 1 2 3 4 5 6 7 8 9 10

**9. Did you mostly sleep in a single or shared room?**

1  Single 2  Shared 3  Don't know

**10. Overall, how would you rate the quality of your sleep in hospital?**

1  Poor 2  Average 3  Good 4  Don't know

**11. Were you given medication to help you sleep in hospital?**

1  Yes 2  No 3  Don't know

**12. Did you feel well rested when you left hospital?**

1  Yes 2  No 3  Don't know

**13. Did you feel your dietary requirements were met in hospital?**

1  Yes 2  No 3  Don't know

➤ If no, please specify \_\_\_\_\_

**14. Was there water always in your reach?**

1  Yes 2  No 3  Don't know

**15. Overall, how would you rate the quality of the food in hospital?**

1  Poor 2  Average 3  Good

**16. During your stay in hospital did you discuss your medications with a health care provider?**

1  Yes 2  No 3  Don't know

➤ **If yes, was this person a (tick all that apply):**

Pharmacist  Doctor  Nurse  Physiotherapist  Other (specify) \_\_\_\_\_

I don't know

**17. If you answered yes to the previous question, did discussing your medications help you to:**

|                                                             | Yes                        | No                         | Don't know                 |
|-------------------------------------------------------------|----------------------------|----------------------------|----------------------------|
| <b>a. Better understand what your medications are for?</b>  | 1 <input type="checkbox"/> | 2 <input type="checkbox"/> | 3 <input type="checkbox"/> |
| <b>b. Feel more confident about taking you medications?</b> | 1 <input type="checkbox"/> | 2 <input type="checkbox"/> | 3 <input type="checkbox"/> |
| <b>c. Take your medications?</b>                            | 1 <input type="checkbox"/> | 2 <input type="checkbox"/> | 3 <input type="checkbox"/> |

**18. As a result of your stay in the hospital did you feel you were:**

|                                             | Same or less               | Better                     | Much better                | Not applicable             |
|---------------------------------------------|----------------------------|----------------------------|----------------------------|----------------------------|
| <b>a. Able to cope with life</b>            | 0 <input type="checkbox"/> | 1 <input type="checkbox"/> | 2 <input type="checkbox"/> | 0 <input type="checkbox"/> |
| <b>b. Able to understand your condition</b> | 0 <input type="checkbox"/> | 1 <input type="checkbox"/> | 2 <input type="checkbox"/> | 0 <input type="checkbox"/> |
| <b>c. Able to cope with your condition</b>  | 0 <input type="checkbox"/> | 1 <input type="checkbox"/> | 2 <input type="checkbox"/> | 0 <input type="checkbox"/> |
| <b>d. Able to keep yourself healthy</b>     | 0 <input type="checkbox"/> | 1 <input type="checkbox"/> | 2 <input type="checkbox"/> | 0 <input type="checkbox"/> |
| <b>e. Confident about your health</b>       | 0 <input type="checkbox"/> | 1 <input type="checkbox"/> | 2 <input type="checkbox"/> | 0 <input type="checkbox"/> |
| <b>f. Able to help yourself</b>             | 0 <input type="checkbox"/> | 1 <input type="checkbox"/> | 2 <input type="checkbox"/> | 0 <input type="checkbox"/> |

## D. When you got home from hospital

1. Do you recall being given information about who to contact if you became unwell after discharge?

1  Yes 2  No 3  Don't know

2. If yes, who were you instructed to contact?

1  Surgeon 2  Nurse at hospital 3  GP 4  Emergency Department

5  Other (specify) \_\_\_\_\_

3. Did you go to the Emergency Department within 30 days of your discharge following surgery?

1  Yes 2  No 3  Don't know

4. If yes to the above, why did you seek help (choose one or more of the following)

1  Pain 2  Wound problems 3  Fall 4  Other (specify) \_\_\_\_\_

5. Were you readmitted to hospital within 30 days of your discharge following surgery?

1  Yes 2  No 3  Don't know

## E. General Practice questions

1. Do you have a GP Practice that you consider your regular general practice?

1  Yes 2  No 3  Don't know

➤ If yes, do you usually see the same doctor at that practice?

1  Yes always 2  Usually but it is not always possible 3  It depends on the problem I have

4  I see anyone - it doesn't make a difference to me

2. Do you make regular appointments to see your GP?

1  Yes, I make regular appointments 2  No, I only see the GP if I feel unwell

3  Both, regular appointments and when I am unwell 4  Neither, I avoid the GP

3. Have you and your GP discussed a plan of how you will manage your health conditions?

1  Yes 2  No 3  Don't know

**4. When you were being discharged from the hospital when were you advised to see a GP next?**

1  Within 1 week    2  2-3 weeks    3  4-6 weeks    4  Don't know

**5. What is the usual waiting time for you to see your GP when you ring for an appointment?**

1  Same day    2  Within a couple of days    3  Within a week    4  1-2 weeks    5  >2 weeks

**6. How soon after surgery did you actually see your GP?**

1  Within 1 week    2  2-3 weeks    3  4-6 weeks    4  Don't know

**7. When you saw your GP, did he/she know that you had been in hospital?**

1  Yes    2  No    3  Don't know

**8. After you were discharged from the hospital did you attend the rehabilitation programme or physiotherapist recommended by your surgeon?**

1  Yes    2  No    3  Don't know    4  I don't recall being advised to attend either of these

**➤ If yes, did you first attend within 5 days of discharge?**

1  Yes    2  No - within 2 weeks    3  No - within 4 weeks    4  Don't know

**➤ If yes, for how long did you attend?**

1  One week    2  2 weeks    3  3 weeks    4  4 weeks    5  More than 4 weeks

**F. About you (Please tick one box for each question)**

**1. What is your date of birth?** \_\_\_\_\_ (DD/MM/YYYY)

**2. What is your gender?**    1  Male    2  Female    3  Other

**3. What is your:**    Height \_\_\_\_\_ cm or inches    Weight \_\_\_\_\_ kg or lbs

**4. Are you of Aboriginal or Torres Strait Islander origin?**

1  Aboriginal    2  Torres Strait Islander    3  Aboriginal and Torres Strait Islander  
4  Neither Aboriginal or Torres Strait Islander

---

**5. Do you speak a language other than English at home?**1  Yes (specify) \_\_\_\_\_ 2  No**6. What is your current living situation?**

- 1  I live alone
- 2  I live with my partner, husband/ wife
- 3  I live with a friend
- 4  I live with my children
- 5  Other (please describe) \_\_\_\_\_

**7. What is the highest qualification you have completed?**

- 1  No school certificate or other qualifications
- 2  School or intermediate certificate (or equivalent)
- 3  Year 12 or leaving certificate (or equivalent)
- 4  Trade/apprenticeship (e.g. hairdresser, chef)
- 5  Certificate/diploma (e.g. child care, technician)
- 6  University degree or higher

**8. What is your country of birth?** \_\_\_\_\_

If you would like to make any comments please provide them in the space below

---

---

---

---

---

**Thank you for completing this survey!**
